# Supplementary material
Source: Springer Nature journal article supplement (https://www.springermedizin.de/resource/supplementary/13063_2014_2170_MOESM2_ESM.pdf/9621550)

**a**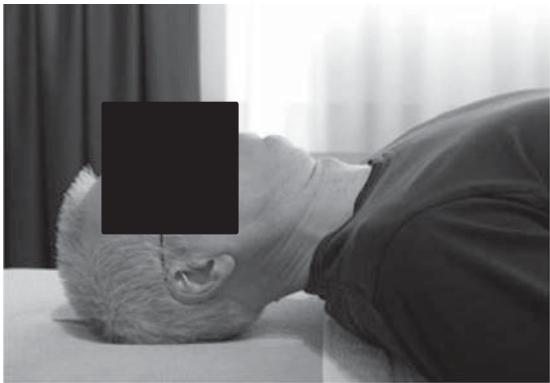**b**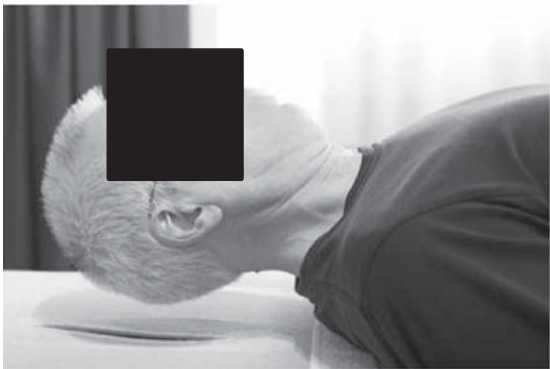

Supplement: MOESM2 [file 9621550]
